# Supplementary material for: Fabrication of MIL-120 membranes supported by a-Al2O3 hollow ceramic fibers for H2 separation
Source: Royal Society of Chemistry journal article supplement (doi:10.1039/c5ra09792d), 2015-01-01
Supplement: c5ra09792d1.pdf [file c5ra09792d1.pdf]

## Supporting Information

### Fabrication of MIL-120 membranes supported by $\alpha$ - $\text{Al}_2\text{O}_3$

#### Hollow ceramic fibers for $\text{H}_2$ separation

Songjie Fan,\* Shan Wu, Jianhua Liu and Dan Liu

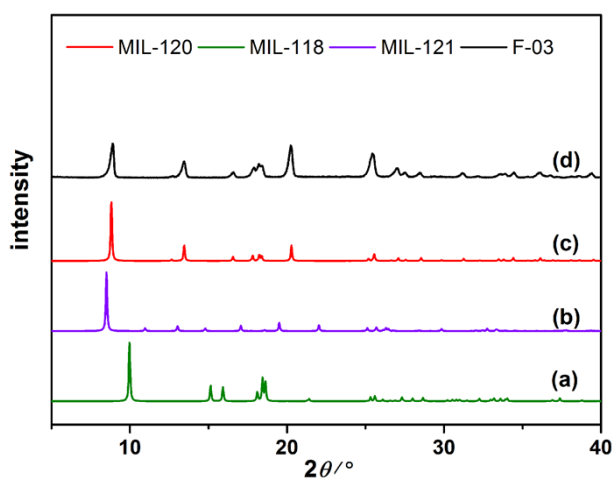

Fig.S1 XRD patterns of simulated (a) MIL-118; (b) MIL-121; (c) MIL-120; and (d) F-03.

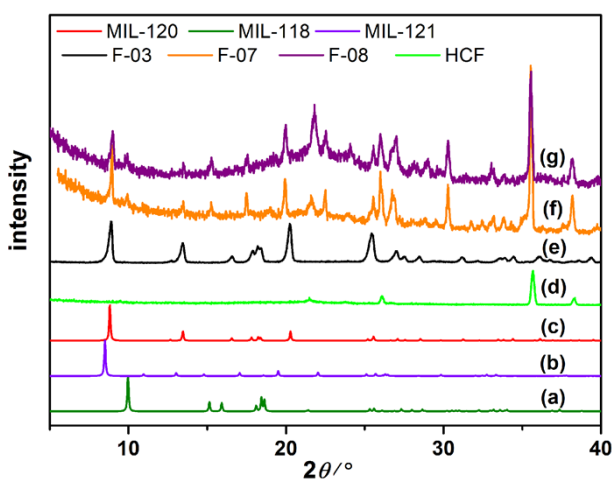

Fig.S2 XRD patterns of simulated (a) MIL-118; (b) MIL-121; (c) MIL-120; (d) HCF; (e) F-03; (f) F-07; (g) F-08.

Table.S1 Single and binary gas permeances ( $\text{mol}\cdot\text{m}^{-2}\cdot\text{s}^{-1}\cdot\text{Pa}^{-1}$ ) and separation factors for the MIL-120 membrane at 293K, 313K, 343K and 1 bar. The volume ratio for binary gas systems is 1:1.

| Gas(H <sub>2</sub> /j)          | Knudsen constant | Temperature (K) | Single gas                   |                       |                         | Binary gas                   |                       |                   |
|---------------------------------|------------------|-----------------|------------------------------|-----------------------|-------------------------|------------------------------|-----------------------|-------------------|
|                                 |                  |                 | Permeances (H <sub>2</sub> ) | Permeances (j)        | Ideal separation factor | Permeances (H <sub>2</sub> ) | Permeances (j)        | Separation factor |
| H <sub>2</sub> /CH <sub>4</sub> | 2.8              | 293             | $3.80 \times 10^{-7}$        | $4.9 \times 10^{-8}$  | 7.7                     | $3.50 \times 10^{-7}$        | $4.43 \times 10^{-8}$ | 7.9               |
|                                 |                  | 313             | $5.0 \times 10^{-7}$         | $7.9 \times 10^{-8}$  | 6.3                     | $4.36 \times 10^{-7}$        | $7.30 \times 10^{-8}$ | 6.0               |
|                                 |                  | 343             | $5.86 \times 10^{-7}$        | $1.14 \times 10^{-7}$ | 5.1                     | $5.0 \times 10^{-7}$         | $1.00 \times 10^{-7}$ | 5.0               |
| H <sub>2</sub> /N <sub>2</sub>  | 3.7              | 293             | $3.80 \times 10^{-7}$        | $5.14 \times 10^{-8}$ | 7.4                     | $3.47 \times 10^{-7}$        | $4.75 \times 10^{-8}$ | 7.3               |
|                                 |                  | 313             | $5.0 \times 10^{-7}$         | $8.33 \times 10^{-8}$ | 6.0                     | $4.21 \times 10^{-7}$        | $6.90 \times 10^{-8}$ | 6.1               |
|                                 |                  | 343             | $5.86 \times 10^{-7}$        | $1.30 \times 10^{-7}$ | 4.5                     | $4.74 \times 10^{-7}$        | $1.05 \times 10^{-7}$ | 4.5               |
| H <sub>2</sub> /CO <sub>2</sub> | 4.7              | 293             | $3.80 \times 10^{-7}$        | $4.13 \times 10^{-8}$ | 9.2                     | $3.58 \times 10^{-7}$        | $3.8 \times 10^{-8}$  | 9.4               |
|                                 |                  | 313             | $5.0 \times 10^{-7}$         | $6.80 \times 10^{-8}$ | 7.3                     | $4.27 \times 10^{-7}$        | $5.90 \times 10^{-8}$ | 7.2               |
|                                 |                  | 343             | $5.86 \times 10^{-7}$        | $9.16 \times 10^{-8}$ | 6.4                     | $4.52 \times 10^{-7}$        | $7.00 \times 10^{-8}$ | 6.4               |

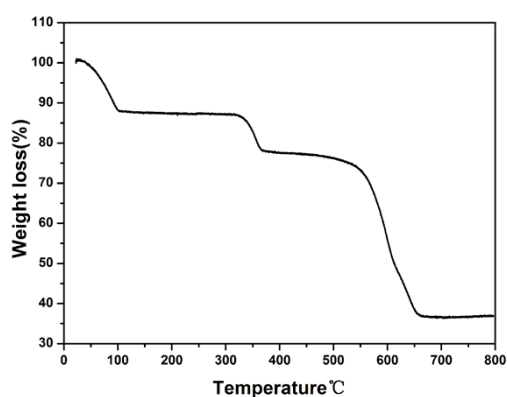

Fig.S3 TG curve of the MIL-120 membrane (F-07) (under air, heating rate:  $1^{\circ}\text{C}\cdot\text{min}^{-1}$ ).

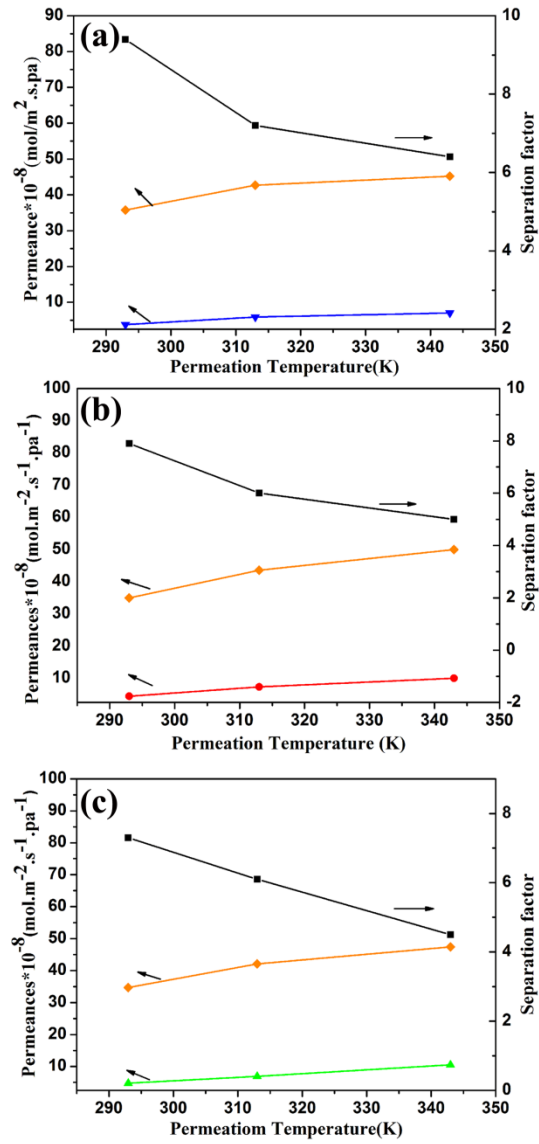

Fig.S4 (a) H<sub>2</sub>/CO<sub>2</sub>, (b) H<sub>2</sub>/CH<sub>4</sub> and (c) H<sub>2</sub>/N<sub>2</sub> permeances and separation factors of the MIL-120 membrane as a function of the permeation temperature at a pressure drop of 1bar (inverted triangles: CO<sub>2</sub>, triangles: N<sub>2</sub>, circles: CH<sub>4</sub>, rhombuses: H<sub>2</sub>, squares: separation factor).

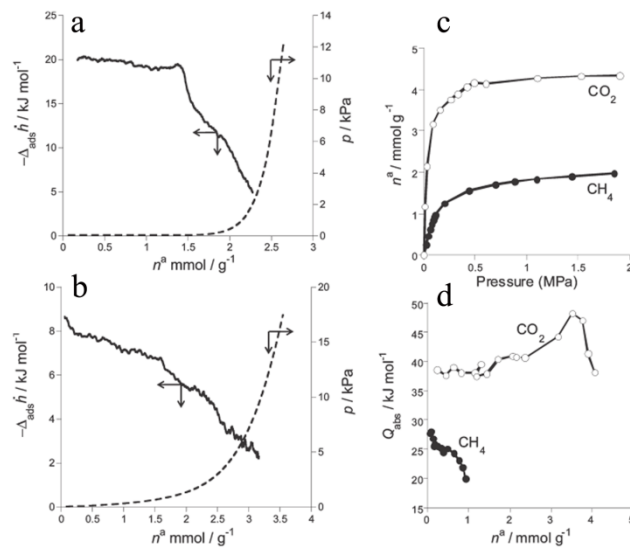

Fig.S5 Differential enthalpies of adsorption and isotherm obtained with (a) nitrogen at 77 K, (b) hydrogen at 77 K on MIL-120, (c) Isotherms and (d) differential enthalpies of adsorption at 303 K obtained with carbon dioxide and methane on MIL-120<sup>1</sup>.

## Reference

1. C. Volkringer, T. Loiseau, M. Haouas, F. Taulelle, D. Popov, M. Burghammer, C. Riegel, C. Zlotea, F. Cuevas and M. Latroche, *Chemistry of Materials*, 2009, **21**, 5783-5791.
